# Supplementary material for: Excited-state dynamics of 3-hydroxychromone in gas phase
Source: Royal Society of Chemistry journal article supplement (doi:10.1039/d4cp01190b), 2024-01-01
Supplement: d4cp01190b1.pdf [file d4cp01190b1.pdf]

Supplementary Information for

## Excited-State Dynamics of 3-Hydroxychromone in Gas Phase

Li Zhao<sup>1,\*</sup>, Xuehui Geng<sup>1</sup>, Jiangyue Wang<sup>1</sup>, Yuxuan Liu<sup>1</sup>, Wenhui Yan<sup>1</sup>, Zhijie Xu<sup>1</sup>, Junsheng Chen<sup>2,\*</sup>

<sup>1</sup>*College of Science, China University of Petroleum (East China) Qingdao 266580,  
Shandong, China*

<sup>2</sup>*Nano-Science Center & Department of Chemistry University of Copenhagen  
Universitetsparken 5, 2100 KøbenhavnØ (Denmark)*

**\*Corresponding to** Li Zhao ([zhaoli282@upc.edu.cn](mailto:zhaoli282@upc.edu.cn)); OCRIID: 0000-0003-2149-1702

Junsheng Chen ([junsheng.chen@chem.ku.dk](mailto:junsheng.chen@chem.ku.dk)); OCRIID: 0000-0002-2934-8030

# CONTENTS

- a. **Figure S1:** The active spaces included in the CASSCF(16,13), CASSCF(12,10) and CASSCF(8,8) calculation levels for the most stable ground-state conformation of 3-HC system.....p. S4
- b. **Figure S2:** The orbitals and orbital promotions involved in forming the first two excited singlet states of 3-HC system.....p. S4
- c. **Figure S3:** The three low-lying electronic state energies relevant to the ground state minimum of different optimized geometries at SA3-CASSCF(12,10)//6-31G\* level (a) and SA3-CASSCF(16,13)//6-31G\*\*, CASPT2//SA3-CASSCF(12,10)//cc-pVDZ and CASPT2//SA3-CASSCF(12,10)//cc-pVTZ level.....p. S5
- d. **Figure S4:** The three low-lying electronic states energies relative to the ground state minimum of different optimized geometries at SA3-CASSCF(12,10)//6-31G\* level .....p.S6
- e. **Figure S5:** The variation of (a) C<sub>7</sub>C<sub>9</sub> and (b) C<sub>7</sub>O<sub>1</sub> bond lengths as functions of the simulation time.....p.S6
- f. **Figure S6:** The variation of (a) O<sub>2</sub>H<sub>6</sub> and O<sub>1</sub>H<sub>6</sub> bond lengths; (b) dihedral angle C<sub>7</sub>C<sub>9</sub>O<sub>2</sub>H<sub>6</sub>7 as functions of the simulation time. The trajectories were run using Newton-X package interfaced with Gaussian 09 software.....p.S6
- g. **Figure S7:** (a)The time-dependent occupation of the S<sub>1</sub> and S<sub>0</sub> state of 3-HC system; (b) key bond lengths of the S<sub>1</sub>→S<sub>0</sub> hopping points. Abscissa value of green, orange and purple star represents the C<sub>9</sub>O<sub>2</sub>, O<sub>1</sub>H<sub>6</sub> and C<sub>7</sub>O<sub>1</sub> bond length of FC point, respectively. Their ordinate values are meaningless. ....p. S7
- h. **Figure S8:** The variation of (a) O<sub>2</sub>H<sub>6</sub> and O<sub>1</sub>H<sub>6</sub> bond lengths; (b) dihedral angle C<sub>7</sub>C<sub>9</sub>O<sub>2</sub>H<sub>6</sub> and (c) O<sub>3</sub>C<sub>8</sub>C<sub>9</sub>H<sub>5</sub> as functions of the simulation time. The rosy balls represent the S<sub>1</sub>→S<sub>0</sub> hopping events. ....p. S7
- i. **Figure S9:** The energy profiles constructed by LIIC method connecting the Franck-Condon geometry and (a) CI<sub>S<sub>2</sub>/S<sub>1</sub>/S<sub>0</sub></sub>-ESIPT; (b) CI<sub>S<sub>1</sub>/S<sub>0</sub></sub>-Pucker-Twist; and (c) CI<sub>S<sub>1</sub>/S<sub>0</sub></sub>-Opening computed at CASPT2//SA3-CASSCF(16,13)//6-31G\*\* level.....p. S7
- j. **Figure S10:** The energy profiles constructed by LIIC method connecting the Franck-Condon geometry and (a) CI<sub>S<sub>2</sub>/S<sub>1</sub>/S<sub>0</sub></sub>-ESIPT; (b) CI<sub>S<sub>1</sub>/S<sub>0</sub></sub>-Pucker-Twist; and (c) CI<sub>S<sub>1</sub>/S<sub>0</sub></sub>-Opening computed at CASPT2//SA3-CASSCF(12,10)//cc-pVDZ level.....p.S8
- k. **Figure S11:** The energy profiles constructed by LIIC method connecting the Franck-Condon geometry and (a) CI<sub>S<sub>2</sub>/S<sub>1</sub>/S<sub>0</sub></sub>-ESIPT; (b) CI<sub>S<sub>1</sub>/S<sub>0</sub></sub>-Pucker-Twist; and (c) CI<sub>S<sub>1</sub>/S<sub>0</sub></sub>-Opening computed at CASPT2//SA3-CASSCF(12,10)//cc-pVTZ level.....p.S8
- l. **Figure S12:** The energy profiles constructed by LIIC method connecting the FC point and (a) CI<sub>S<sub>2</sub>/S<sub>1</sub>/S<sub>0</sub></sub>-ESIPT; (b) CI<sub>S<sub>1</sub>/S<sub>0</sub></sub>-Pucker-Twist; and (c) CI<sub>S<sub>1</sub>/S<sub>0</sub></sub>-Opening computed at SA3-CASSCF(12,10)// 6-31G\* level.....p.S9

- m. **Figure S13:** The energy potential curve of the S<sub>1</sub> state constructed by scanning the O<sub>1</sub>H<sub>6</sub> bond length from 2.199 Å to 0.999 Å (a) and C<sub>7</sub>C<sub>9</sub>O<sub>2</sub>H<sub>6</sub> dihedral angle from 0° to 180° computed at TDDFT//B3LYP//6-31G\* level. ....p.S9
- n. **Figure S14:** The distributions of the O<sub>1</sub>H<sub>6</sub> (a), C<sub>7</sub>C<sub>9</sub>O<sub>2</sub>H<sub>6</sub> (b) and energy information (c) of the final structures of the trajectories remain in the S<sub>1</sub> state at the end of simulations.....p.S10
- o. **Figure S15:** The distributions of the S<sub>1</sub> energies of the final structures of the trajectories remain in the S<sub>1</sub> state at the end of simulations.....p.S10
- p. **Table S1:** The vertical excitation energies and relative energies (in eV) of critical points calculated at the CASPT2//SA3-CASSCF(12,10)//6-31G\* level.....p.S11
- q. **Table S2:** The vertical excitation energies and relative energies (in eV) of critical points calculated at the CASPT2//SA3-CASSCF(16,13)//6-31G\*\*, CASPT2//SA3-CASSCF(12,10)//cc-pVDZ and CASPT2//SA3-CASSCF(12,10)//cc-pVTZ level, .....p.S11
- r. **Table S3:** Key geometrical parameters (bond lengths in Å, angles in degree) obtained at the SA3-CASSCF(12,10)//6-31G\*, SA3-CASSCF(10,8)//6-31G\*, SA3-CASSCF(8,8)//6-31G and SA3-CASSCF(6,6)//6-31G levels for several critical structures of the 3-HC system.....p.S11
- s. **Table S4-S9:** The Cartesian coordinates of optimized structures calculated at SA3-CASSCF(12,10)// 6-31G\* level.....p. S13-S18

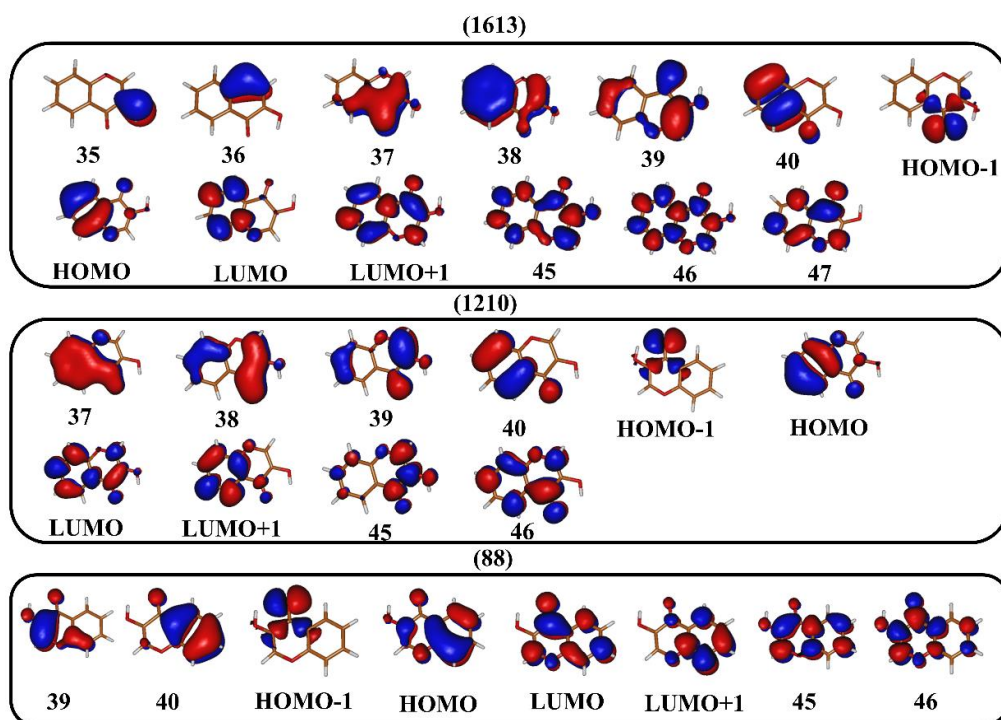

**Figure S1** The active spaces included in the SA3-CASSCF(16,13)//6-31G\*\* (top), SA3-CASSCF(12,10)//6-31G\* (middle) and SA3-CASSCF(8,8)//6-31G (bottom) calculation levels for the most stable ground-state conformation of 3-HC system.

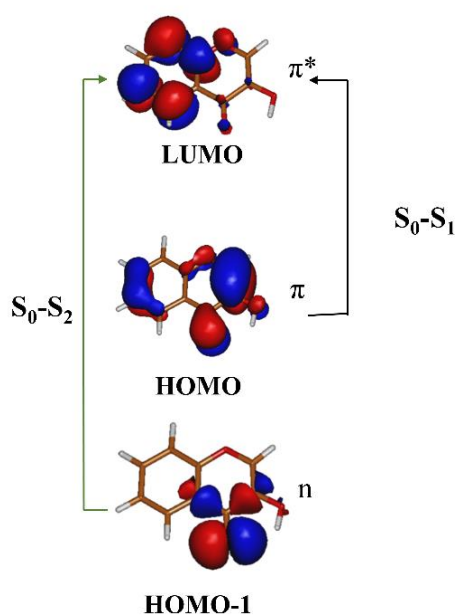

**Figure S2** Orbitals and orbital promotions involved in forming the first two excited singlet states of 3-HC system.

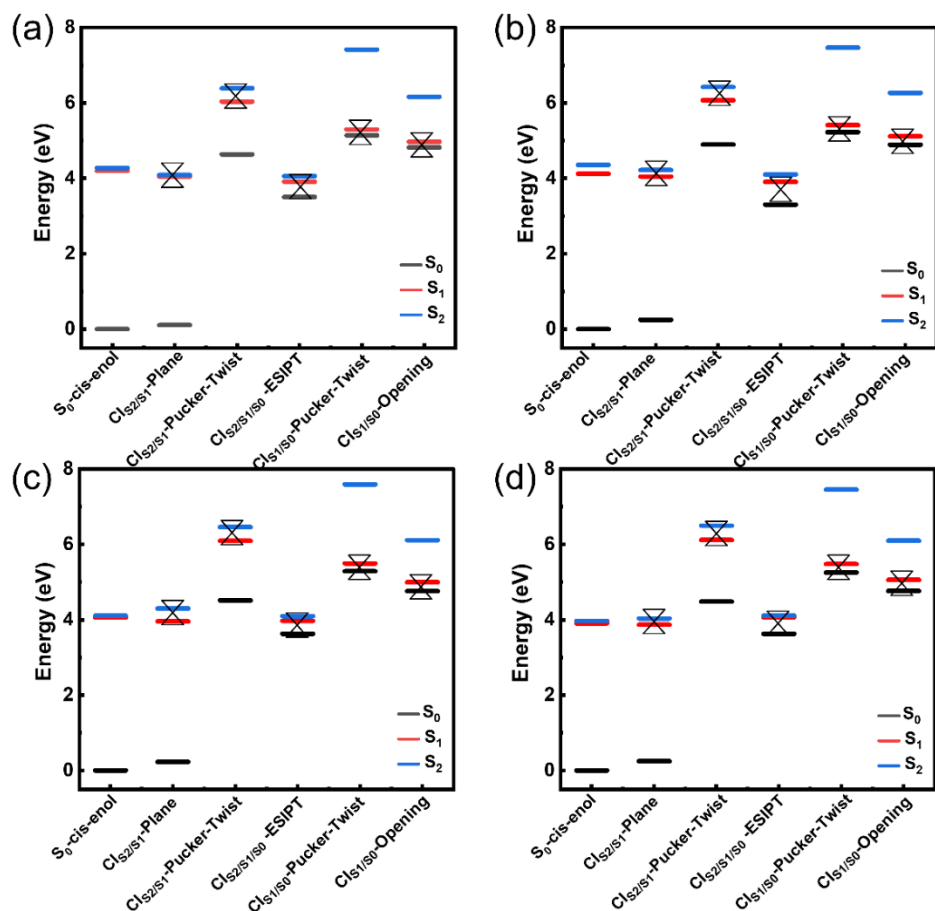

**Figure S3** The three low-lying electronic states energies relative to the ground state minimum of different optimized geometries at CASPT2//SA3-CASSCF(12,10)//6-31G\* level (a), CASPT2//SA3-CASSCF(16,13)//6-31G\*\* level (b), CASPT2//SA3-CASSCF(12,10)//cc-pVDZ (c) and CASPT2//SA3-CASSCF(12,10)//cc-pVTZ (d).

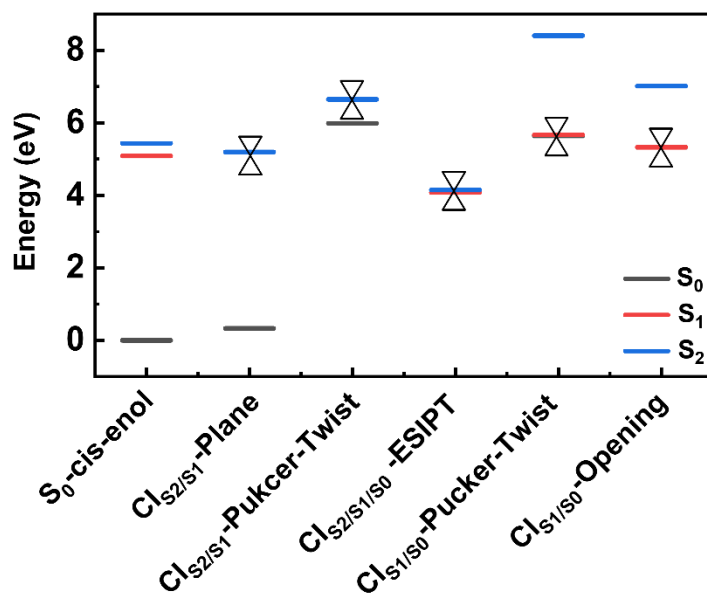

**Figure S4** The three low-lying electronic states energies relative to the ground state minimum of different optimized geometries at SA3-CASSCF(12,10)//6-31G\* level.

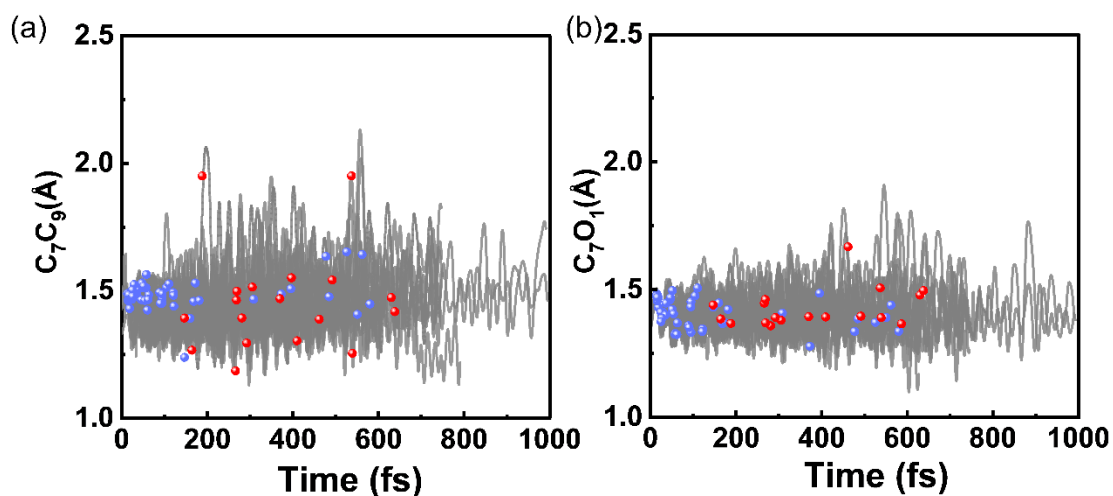

**Figure S5** The variation of (a) C<sub>7</sub>C<sub>9</sub> and (b) C<sub>7</sub>O<sub>1</sub> bond lengths as functions of the simulation time.

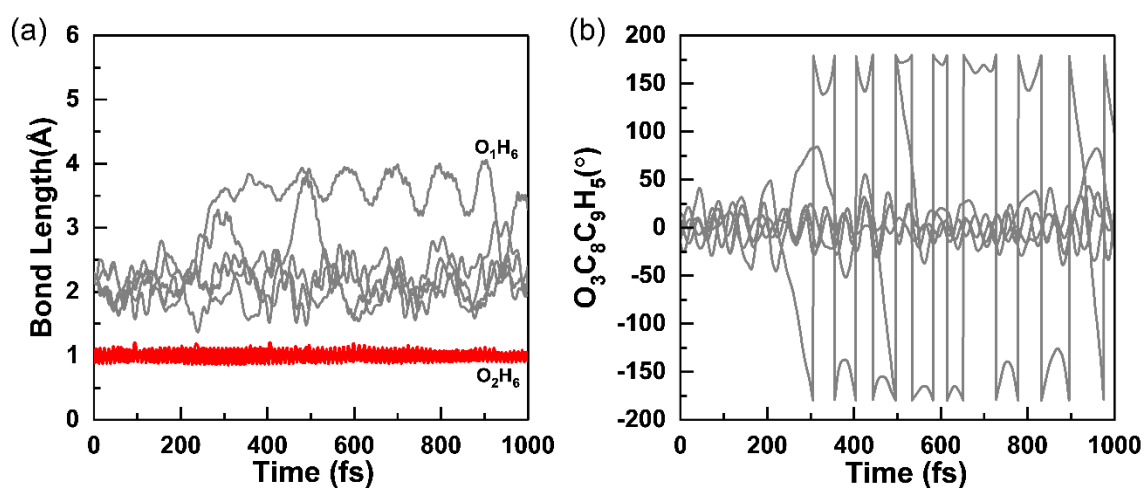

**Figure S6** The variation of (a) O<sub>2</sub>H<sub>6</sub> and O<sub>1</sub>H<sub>6</sub> bond lengths; (b) dihedral angle C<sub>7</sub>C<sub>9</sub>O<sub>2</sub>H<sub>6</sub>7 as functions of the simulation time. The trajectories were run using Newton-X package interfaced with Gaussian 09 software.

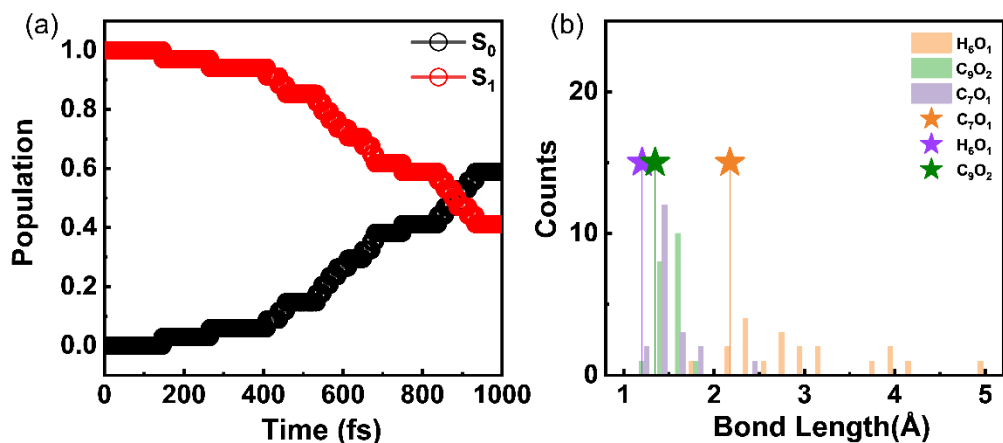

**Figure S7** (a) The time-dependent occupation of the  $S_1$  and  $S_0$  state of 3-HC system; (b) key bond lengths of the  $S_1 \rightarrow S_0$  hopping points. Abscissa value of green, orange and purple star represents the  $C_9O_2$ ,  $O_1H_6$  and  $C_7O_1$  bond length of FC point, respectively. Their ordinate values are meaningless.

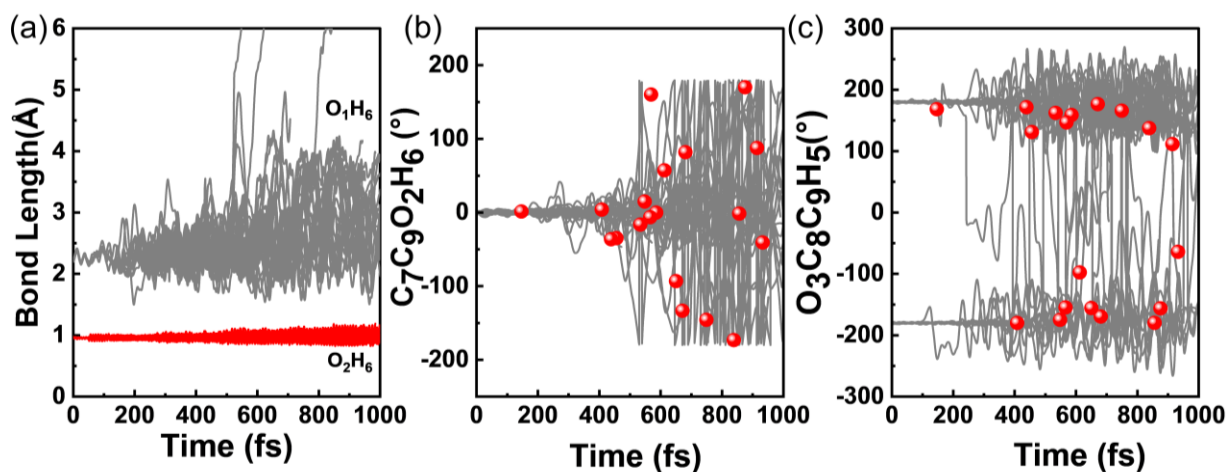

**Figure S8** The variation of (a)  $O_2H_6$  and  $O_1H_6$  bond lengths; (b) dihedral angle  $C_7C_9O_2H_6$  and (c)  $O_3C_8C_9H_5$  as functions of the simulation time. The rosy balls represent the  $S_1 \rightarrow S_0$  hopping events.

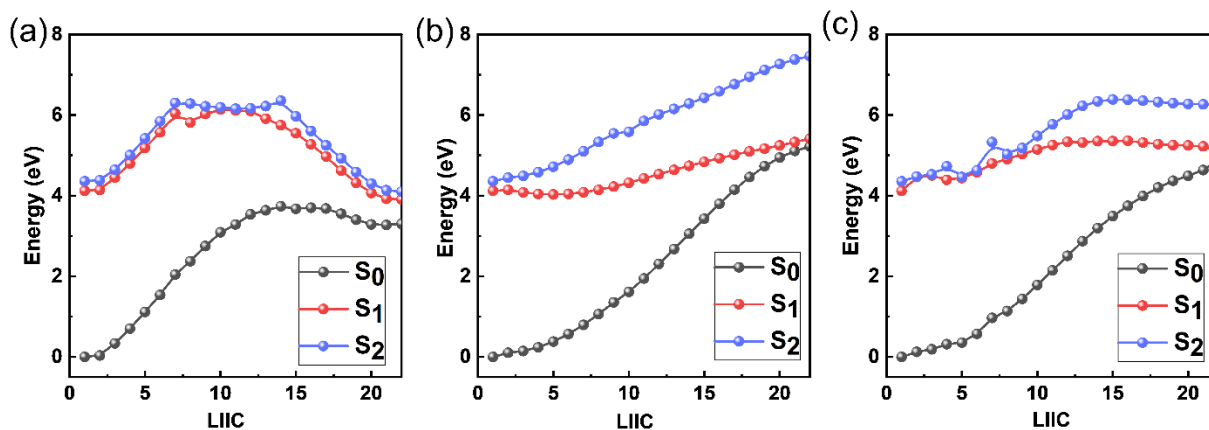

**Figure S9** The energy profiles constructed by LIIC method connecting the Franck-Condon geometry and (a)  $CI_{S_2/S_1/S_0}$ -ESIPT; (b)  $CI_{S_1/S_0}$ -Pucker-Twist; and (c)  $CI_{S_1/S_0}$ -Opening computed at CASPT2//SA3-CASSCF(16,13)//6-31G\*\* level.

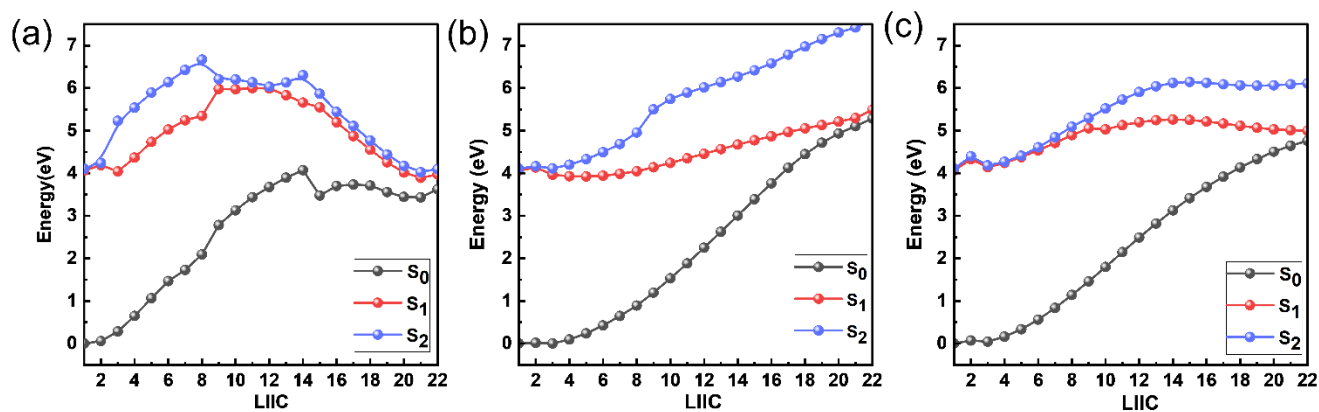

**Figure S10** The energy profiles constructed by LIIC method connecting the Franck-Condon geometry and (a)  $CI_{S_2/S_1/S_0}$ -ESIPT; (b)  $CI_{S_1/S_0}$ -Pucker-Twist; and (c)  $CI_{S_1/S_0}$ -Opening computed at CASPT2//SA3-CASSCF(12,10)//cc-pVDZ level.

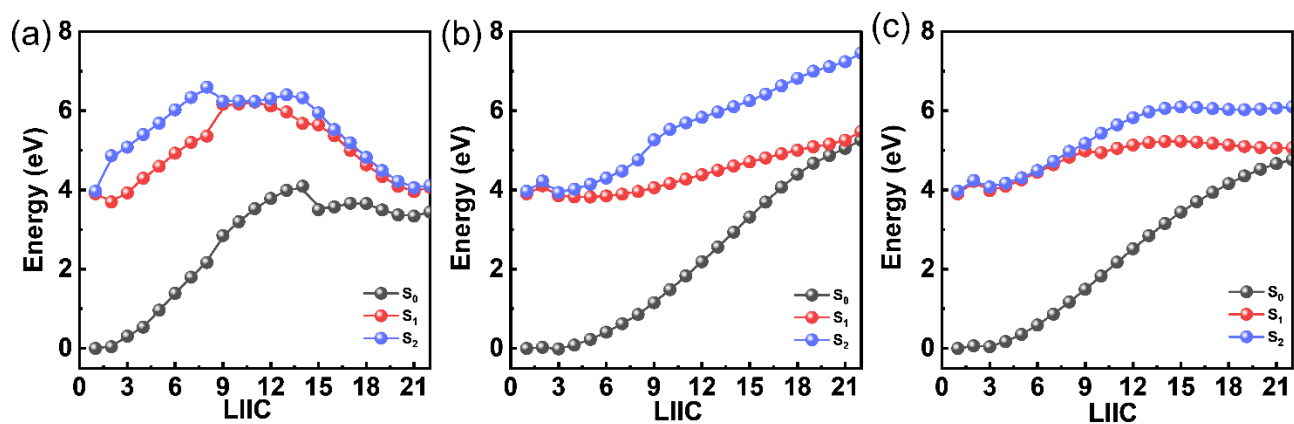

**Figure S11** The energy profiles constructed by LIIC method connecting the Franck-Condon geometry and (a)  $CI_{S_2/S_1/S_0}$ -ESIPT; (b)  $CI_{S_1/S_0}$ -Pucker-Twist; and (c)  $CI_{S_1/S_0}$ -Opening computed at CASPT2//SA3-CASSCF(12,10)//cc-pVTZ level.



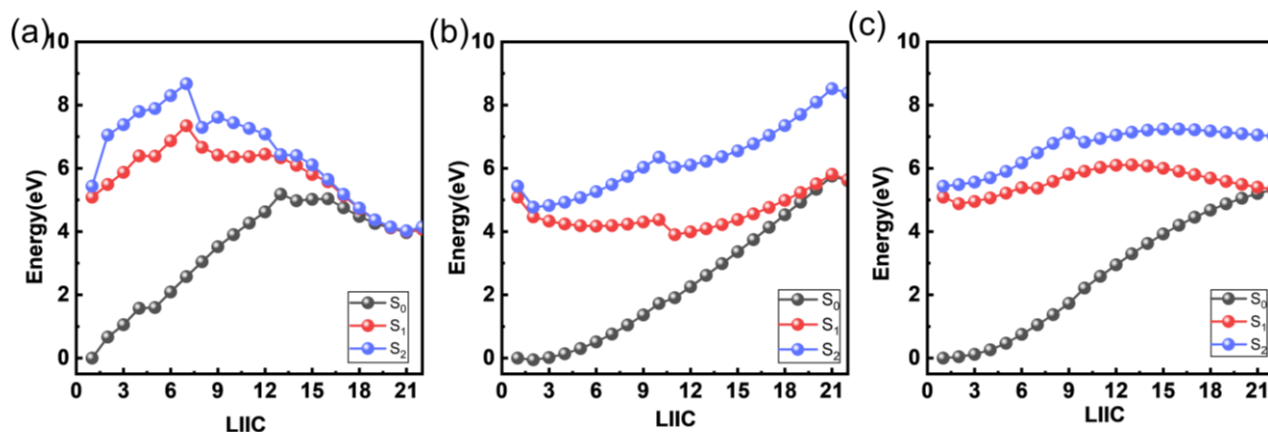

**Figure S12** The energy profiles constructed by LIIC method connecting the Franck-Condon geometry and (a)  $CI_{S_2/S_1/S_0}$ -ESIPT; (b)  $CI_{S_1/S_0}$ -Pucker-Twist; and (c)  $CI_{S_1/S_0}$ -Opening computed at SA3-CASSCF(12,10)// 6-31G\* level.

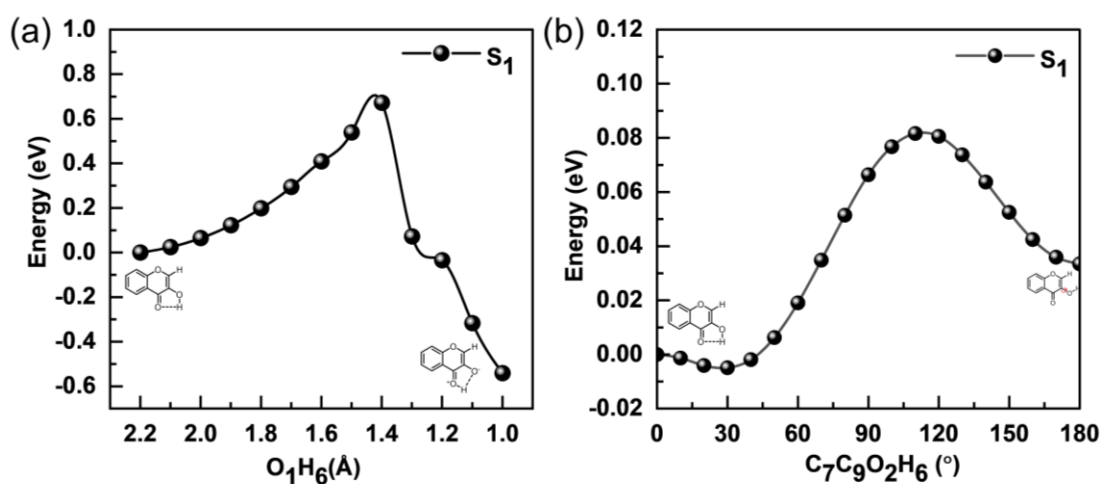

**Figure S13** The energy potential curve of the  $S_1$  state constructed by scanning (a) the  $O_1H_6$  bond length from 2.199 Å to 0.999 Å and (b)  $C_7C_9O_2H_6$  dihedral angle from  $0^\circ$  to  $180^\circ$  computed at TDDFT//B3LYP//6-31G\* level.

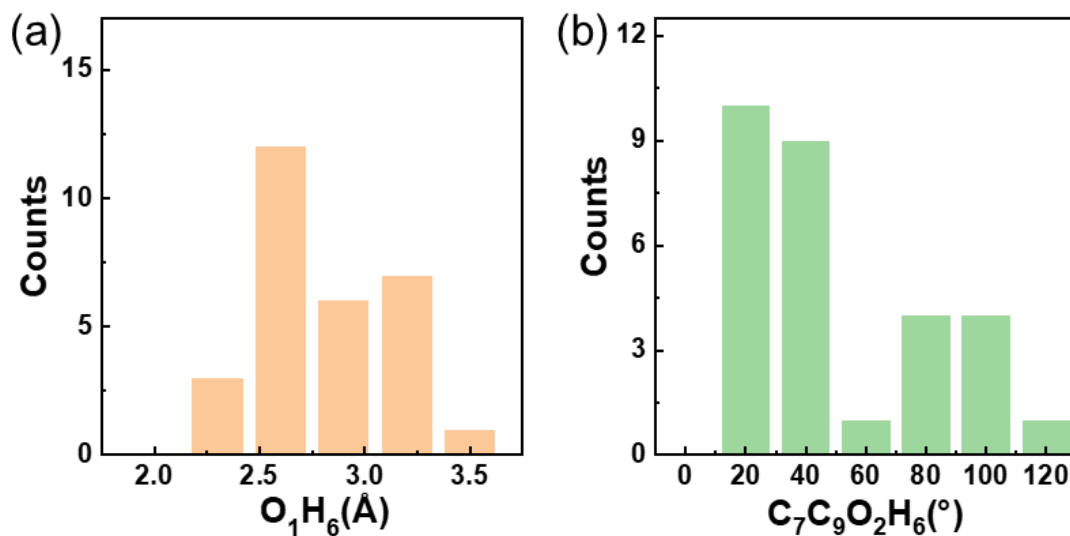

**Figure S14** The distributions of the  $O_1H_6$  (a) and  $C_7C_9O_2H_6$  (b) of the final structures of the trajectories remain in the  $S_1$  state at the end of simulations.

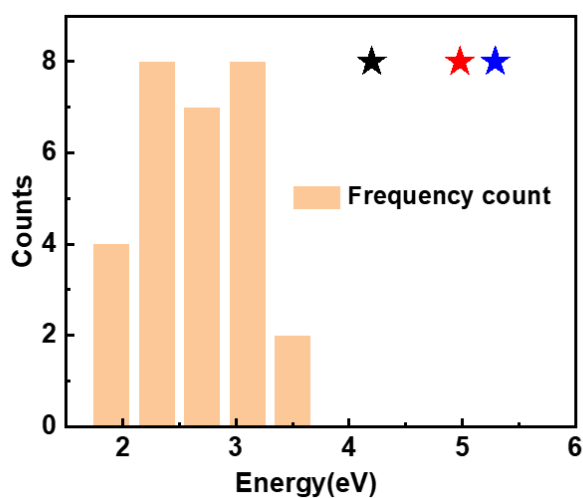

**Figure S15** The distributions of the  $S_1$  energies of the final structures of the trajectories remain in the  $S_1$  state at the end of simulations. The black, red and blue star indicates the  $S_1$  energy of FC point, energy barrier along the ESIPT process (in Figure 6(a)), and the  $S_1$  energy of  $CI_{S_1/S_0}$ -Pucker-Twist, respectively.

**Table S1** The vertical excitation energies and relative energies (in eV) of critical points calculated at the CASPT2//SA3-CASSCF(12,10)//6-31G\* and SA3-CASSCF(12,10)//6-31G\* level.

| Geo.                                    | S <sub>0</sub> →S <sub>1</sub> | S <sub>0</sub> →S <sub>2</sub> | S <sub>0</sub> →S <sub>3</sub> |
|-----------------------------------------|--------------------------------|--------------------------------|--------------------------------|
| S <sub>0</sub> -cis-enol <sup>a</sup>   | 4.13                           | 4.19                           | 5.35                           |
| S <sub>0</sub> -cis-enol <sup>b</sup>   | 5.09                           | 5.43                           |                                |
| S <sub>1</sub> -cis-enol <sup>a</sup>   | 3.78                           | 3.96                           |                                |
| S <sub>1</sub> -cis-keto <sup>a</sup>   | 1.63                           | 1.79                           |                                |
| S <sub>1</sub> -trans-enol <sup>a</sup> | 2.73                           | 3.94                           |                                |

<sup>a</sup> CASPT2//SA4-CASSCF(12,10)//6-31G\*;<sup>b</sup> SA3-CASSCF(12,10)//6-31G\*

**Table S2** The vertical excitation energies and relative energies (in eV) of critical points calculated at the CASPT2//SA3-CASSCF(16,13)//6-31G\*\*, CASPT2//SA3-CASSCF(12,10)//cc-pVDZ and CASPT2//SA3-CASSCF(12,10)//cc-pVTZ level.

| Geo.                                                           | (16,13)//6-31G**               |                                | (12,10)//cc-pVDZ               |                                | (12,10)//cc-pVTZ               |                                |
|----------------------------------------------------------------|--------------------------------|--------------------------------|--------------------------------|--------------------------------|--------------------------------|--------------------------------|
|                                                                | S <sub>0</sub> →S <sub>1</sub> | S <sub>0</sub> →S <sub>2</sub> | S <sub>0</sub> →S <sub>1</sub> | S <sub>0</sub> →S <sub>2</sub> | S <sub>0</sub> →S <sub>1</sub> | S <sub>0</sub> →S <sub>2</sub> |
| S <sub>0</sub> -cis-enol                                       | 4.12                           | 4.35                           | 4.06                           | 4.11                           | 3.90                           | 3.97                           |
| CI <sub>S<sub>2</sub>/S<sub>1</sub></sub> -Plane               | 3.77                           | 4.03                           | 3.72                           | 4.06                           | 3.61                           | 3.78                           |
| CI <sub>S<sub>2</sub>/S<sub>1</sub></sub> -Pucker-Twist        | 1.17                           | 1.52                           | 1.58                           | 1.94                           | 1.63                           | 2.01                           |
| CI <sub>S<sub>2</sub>/S<sub>1</sub>/S<sub>0</sub></sub> -ESIPT | 0.45                           | 0.80                           | 0.34                           | 0.47                           | 0.42                           | 0.66                           |
| CI <sub>S<sub>1</sub>/S<sub>0</sub></sub> -Pucker-Twist        | 0.19                           | 2.24                           | 0.20                           | 2.30                           | 0.22                           | 2.19                           |
| CI <sub>S<sub>1</sub>/S<sub>0</sub></sub> -Opening             | 0.22                           | 1.37                           | 0.23                           | 1.35                           | 0.29                           | 1.33                           |

**Table S3** Key geometrical parameters (bond lengths in Å, angles in degree) obtained at the SA3-CASSCF(12,10)//6-31G\*, SA3-CASSCF(10,8)//6-31G\*, SA3-CASSCF(8,8)//6-31G\* and SA3-CASSCF(6,6)//6-31G levels for several critical structures of the 3-HC system.

| Geo.                       | Method                       | C <sub>9</sub> O <sub>2</sub> | O <sub>2</sub> H <sub>6</sub> | O <sub>1</sub> H <sub>6</sub> | C <sub>7</sub> C <sub>9</sub> | C <sub>7</sub> O <sub>1</sub> | C <sub>7</sub> C <sub>9</sub> O <sub>2</sub> H <sub>6</sub> | O <sub>3</sub> C <sub>8</sub> C <sub>9</sub> H <sub>5</sub> |
|----------------------------|------------------------------|-------------------------------|-------------------------------|-------------------------------|-------------------------------|-------------------------------|-------------------------------------------------------------|-------------------------------------------------------------|
| S <sub>0</sub> -cis-enol   | CASSCF(12,10) <sup>[a]</sup> | 1.349                         | 0.952                         | 2.199                         | 1.461                         | 1.235                         | 0.0                                                         | 180.0                                                       |
|                            | CASSCF(10,8) <sup>[a]</sup>  | 1.352                         | 0.952                         | 2.198                         | 1.462                         | 1.198                         | 0.0                                                         | 180.0                                                       |
|                            | CASSCF(8,8) <sup>[a]</sup>   | 1.371                         | 0.953                         | 2.297                         | 1.467                         | 1.239                         | 0.0                                                         | 180.0                                                       |
|                            | CASSCF(6,6) <sup>[b]</sup>   | 1.358                         | 0.973                         | 2.128                         | 1.445                         | 1.235                         | 0.0                                                         | 180.0                                                       |
| S <sub>1</sub> -cis-enol   | CASSCF(12,10) <sup>[a]</sup> | 1.344                         | 0.953                         | 2.147                         | 1.480                         | 1.248                         | 0.0                                                         | 180.0                                                       |
|                            | CASSCF(10,8) <sup>[a]</sup>  | 1.347                         | 0.953                         | 2.164                         | 1.474                         | 1.206                         | 0.0                                                         | 180.0                                                       |
|                            | CASSCF(8,8) <sup>[a]</sup>   | 1.379                         | 0.949                         | 2.431                         | 1.439                         | 1.242                         | 0.0                                                         | 180.0                                                       |
|                            | CASSCF(6,6) <sup>[b]</sup>   | 1.368                         | 0.954                         | 2.257                         | 1.465                         | 1.233                         | 0.0                                                         | 180.0                                                       |
| S <sub>0</sub> -cis-keto   | CASSCF(12,10) <sup>[a]</sup> | 1.212                         | 2.153                         | 0.957                         | 1.490                         | 1.323                         | 0.0                                                         | 180.0                                                       |
|                            | CASSCF(10,8) <sup>[a]</sup>  | 1.220                         | 2.120                         | 0.957                         | 1.444                         | 1.323                         | 0.0                                                         | 180.0                                                       |
|                            | CASSCF(8,8) <sup>[a]</sup>   | 1.246                         | 2.246                         | 0.957                         | 1.448                         | 1.347                         | 0.0                                                         | 180.0                                                       |
|                            | CASSCF(6,6) <sup>[b]</sup>   | 1.258                         | 2.119                         | 0.961                         | 1.437                         | 1.328                         | 0.0                                                         | 180.0                                                       |
| S <sub>1</sub> -cis-keto   | CASSCF(12,10) <sup>[a]</sup> | 1.384                         | 2.349                         | 0.949                         | 1.472                         | 1.347                         | 0.0                                                         | 180.0                                                       |
|                            | CASSCF(10,8) <sup>[a]</sup>  | 1.391                         | 2.326                         | 0.949                         | 1.393                         | 1.347                         | 0.0                                                         | 180.0                                                       |
|                            | CASSCF(8,8) <sup>[a]</sup>   | 1.417                         | 2.410                         | 0.951                         | 1.391                         | 1.368                         | 0.0                                                         | 180.0                                                       |
|                            | CASSCF(6,6) <sup>[b]</sup>   | 1.401                         | 2.401                         | 0.952                         | 1.391                         | 1.365                         | 0.0                                                         | 180.0                                                       |
| S <sub>0</sub> -trans-enol | CASSCF(12,10) <sup>[a]</sup> | 1.350                         | 0.947                         | 3.655                         | 1.472                         | 1.209                         | 180.0                                                       | 180.0                                                       |
|                            | CASSCF(10,8) <sup>[a]</sup>  | 1.348                         | 0.948                         | 3.650                         | 1.481                         | 1.209                         | 180.0                                                       | 180.0                                                       |
|                            | CASSCF(8,8) <sup>[a]</sup>   | 1.370                         | 0.950                         | 3.667                         | 1.476                         | 1.233                         | 180.0                                                       | 180.0                                                       |
|                            | CASSCF(6,6) <sup>[b]</sup>   | 1.369                         | 0.950                         | 3.668                         | 1.469                         | 1.216                         | 180.0                                                       | 180.0                                                       |
| S <sub>1</sub> -trans-enol | CASSCF(12,10) <sup>[a]</sup> | 1.356                         | 0.947                         | 3.666                         | 1.399                         | 1.359                         | 180.0                                                       | 180.0                                                       |
|                            | CASSCF(10,8) <sup>[a]</sup>  | 1.351                         | 0.948                         | 3.640                         | 1.436                         | 1.372                         | 180.0                                                       | 180.0                                                       |
|                            | CASSCF(8,8) <sup>[a]</sup>   | 1.372                         | 0.950                         | 3.646                         | 1.437                         | 1.396                         | 180.0                                                       | 180.0                                                       |
|                            | CASSCF(6,6) <sup>[b]</sup>   | 1.367                         | 0.950                         | 3.692                         | 1.484                         | 1.242                         | 180.0                                                       | 180.0                                                       |

<sup>[a]</sup> 6-31G\* basis set; <sup>[b]</sup> 6-31G basis set;

**Table S4** Cartesian coordinates of S<sub>0</sub>-min (left) and S<sub>1</sub>-min (right) of 3-HC cis-enol tautomer optimized at SA3-CASSCF(12,10)//6-31G\* level.

| SA3-CASSCF(12,10)//6-31G* |               |               |              | SA3-CASSCF(12,10)//6-31G* |               |               |              |
|---------------------------|---------------|---------------|--------------|---------------------------|---------------|---------------|--------------|
|                           | X             | Y             | Z            |                           | X             | Y             | Z            |
| C                         | -4.0453510459 | -1.4426837932 | 0.0000000000 | C                         | -4.0757499855 | -1.4563057200 | 0.0000000000 |
| C                         | -2.6597570914 | -1.4883127248 | 0.0000000000 | C                         | -2.6253831535 | -1.5161645904 | 0.0000000000 |
| C                         | -1.9133134093 | -0.2932926067 | 0.0000000000 | C                         | -1.8729466724 | -0.3120159534 | 0.0000000000 |
| C                         | -2.5802578110 | 0.9221085045  | 0.0000000000 | C                         | -2.5916544523 | 0.9299596434  | 0.0000000000 |
| C                         | -3.9693421990 | 0.9817150969  | 0.0000000000 | C                         | -3.9723529695 | 0.9999647740  | 0.0000000000 |
| C                         | -4.6971790872 | -0.1990811222 | 0.0000000000 | C                         | -4.7518539722 | -0.1907381395 | 0.0000000000 |
| H                         | -4.6187068417 | -2.3508385544 | 0.0000000000 | H                         | -4.6385658328 | -2.3692552517 | 0.0000000000 |
| H                         | -2.1312638162 | -2.4219237431 | 0.0000000000 | H                         | -2.1130272367 | -2.4560733933 | 0.0000000000 |
| C                         | -0.4475827261 | -0.2999540281 | 0.0000000000 | C                         | -0.4401107297 | -0.3004669583 | 0.0000000000 |
| H                         | -4.4499322715 | 1.9414774687  | 0.0000000000 | H                         | -4.4312039591 | 1.9692694659  | 0.0000000000 |
| H                         | -5.7708041177 | -0.1556634528 | 0.0000000000 | H                         | -5.8218917395 | -0.1428807396 | 0.0000000000 |
| C                         | -0.5748435023 | 2.1110509880  | 0.0000000000 | C                         | -0.5559109374 | 2.1261693057  | 0.0000000000 |
| C                         | 0.1752311022  | 1.0194712536  | 0.0000000000 | C                         | 0.1904140450  | 1.0388008756  | 0.0000000000 |
| H                         | -0.1783026712 | 3.1047635693  | 0.0000000000 | H                         | -0.1904020756 | 3.1299647542  | 0.0000000000 |
| O                         | 0.2502277746  | -1.3197411033 | 0.0000000000 | O                         | 0.2916718460  | -1.3122089591 | 0.0000000000 |
| O                         | 1.5233870179  | 1.0795887774  | 0.0000000000 | O                         | 1.5299428583  | 1.0771981057  | 0.0000000000 |
| H                         | 1.8527588031  | 0.1867051134  | 0.0000000000 | H                         | 1.8401335569  | 0.1755182323  | 0.0000000000 |
| O                         | -1.9219905622 | 2.0950087328  | 0.0000000000 | O                         | -1.9281310450 | 2.0796629245  | 0.0000000000 |

**Table S5** Cartesian coordinates of S<sub>0</sub>-min (left) and S<sub>1</sub>-min (right) of 3-HC trans-enol tautomer optimized at SA3-CASSCF(12,10)//6-31G\* level.

| SA3-CASSCF(12,10)//6-31G* |               |              |               | SA3-CASSCF(12,10)//6-31G* |               |               |               |
|---------------------------|---------------|--------------|---------------|---------------------------|---------------|---------------|---------------|
|                           | X             | Y            | Z             |                           | X             | Y             | Z             |
| C                         | -4.1263159459 | 0.8536014735 | 2.2990757314  | C                         | -2.6799145415 | -1.0848151493 | 0.0252561511  |
| C                         | -2.7457379962 | 0.9068138159 | 2.3843454510  | C                         | -1.3363579318 | -1.4520979579 | 0.0294807565  |
| C                         | -1.9607969248 | 0.9370682281 | 1.2195171862  | C                         | -0.3302140510 | -0.4760568966 | 0.0033062231  |
| C                         | -2.5887405392 | 0.9128650966 | -0.0143382153 | C                         | -0.7166627544 | 0.8796009387  | -0.0156080475 |
| C                         | -3.9751118454 | 0.8594294826 | -0.1155300087 | C                         | -2.0378907971 | 1.2434498931  | -0.0187801681 |
| C                         | -4.7407792055 | 0.8299179248 | 1.0372256067  | C                         | -3.0308925640 | 0.2620606047  | -0.0007803209 |
| H                         | -4.7243554802 | 0.8305508928 | 3.1911477800  | H                         | -3.4417440262 | -1.8425784233 | 0.0470031567  |
| H                         | -2.2472558743 | 0.9260270628 | 3.3343224568  | H                         | -1.0528991392 | -2.4868310207 | 0.0656645020  |
| C                         | -0.4854853845 | 0.9939318728 | 1.2976688633  | C                         | 1.0752583119  | -0.7863914128 | -0.0054559839 |
| H                         | -4.4229647299 | 0.8421676909 | -1.0912067198 | H                         | -2.2866606524 | 2.2882863519  | -0.0337413679 |
| H                         | -5.8118408937 | 0.7886354278 | 0.9598857522  | H                         | -4.0646676310 | 0.5549778976  | -0.0034613915 |
| C                         | -0.5450091339 | 0.9916375774 | -1.1452683608 | C                         | 1.5364707702  | 1.5895963182  | -0.0004425182 |
| C                         | 0.1809050879  | 1.0196168065 | -0.0154134275 | C                         | 1.9771090407  | 0.2870162693  | 0.0138295289  |
| H                         | -0.1269794076 | 1.0077498739 | -2.1318483641 | H                         | 2.1612593267  | 2.4545354422  | 0.0173592210  |
| O                         | 0.1264559621  | 1.0175183042 | 2.3407283169  | O                         | 1.5252705606  | -2.0718571408 | 0.0352790027  |
| O                         | 1.5305053585  | 1.0716349822 | 0.0163155671  | O                         | 3.3130528170  | 0.0333175567  | 0.0433629187  |
| H                         | 1.8911645105  | 1.0855359894 | -0.8602256789 | O                         | 0.2065683493  | 1.8796458780  | -0.0312705311 |
| O                         | -1.8989947567 | 0.9394503406 | -1.1756165117 | H                         | 1.5639355223  | -2.4378955488 | -0.8408358415 |

**Table S6** Cartesian coordinates of S<sub>0</sub>-min (left) and S<sub>1</sub>-min (right) of 3-HC cis-keto tautomer optimized at SA3-CASSCF(12,10)//6-31G\* level.

| SA3-CASSCF(12,10)//6-31G* |               |               |              | SA3-CASSCF(12,10)//6-31G* |               |              |               |
|---------------------------|---------------|---------------|--------------|---------------------------|---------------|--------------|---------------|
|                           | X             | Y             | Z            |                           | X             | Y            | Z             |
| C                         | -2.6591481345 | -1.0986636540 | 0.0000000000 | C                         | -4.1263159459 | 0.8536014735 | 2.2990757314  |
| C                         | -1.3648267361 | -1.4763884886 | 0.0000000000 | C                         | -2.7457379962 | 0.9068138159 | 2.3843454510  |
| C                         | -0.3249935572 | -0.4859293631 | 0.0000000000 | C                         | -1.9607969248 | 0.9370682281 | 1.2195171862  |
| C                         | -0.7044550595 | 0.8599739022  | 0.0000000000 | C                         | -2.5887405392 | 0.9128650966 | -0.0143382153 |
| C                         | -2.0687153594 | 1.2481407699  | 0.0000000000 | C                         | -3.9751118454 | 0.8594294826 | -0.1155300087 |
| C                         | -3.0179584059 | 0.2870018376  | 0.0000000000 | C                         | -4.7407792055 | 0.8299179248 | 1.0372256067  |
| H                         | -3.4378088828 | -1.8390548180 | 0.0000000000 | H                         | -4.7243554802 | 0.8305508928 | 3.1911477800  |
| H                         | -1.0838152366 | -2.5118796928 | 0.0000000000 | H                         | -2.2472558743 | 0.9260270628 | 3.3343224568  |
| C                         | 1.0448237582  | -0.7763975656 | 0.0000000000 | C                         | -0.4854853845 | 0.9939318728 | 1.2976688633  |
| H                         | -2.3085649314 | 2.2946364940  | 0.0000000000 | H                         | -4.4229647299 | 0.8421676909 | -1.0912067198 |
| H                         | -4.0572657791 | 0.5596817303  | 0.0000000000 | H                         | -5.8118408937 | 0.7886354278 | 0.9598857522  |
| C                         | 1.5148863166  | 1.5890269808  | 0.0000000000 | C                         | -0.5450091339 | 0.9916375774 | -1.1452683608 |
| C                         | 2.0885839342  | 0.2877493661  | 0.0000000000 | C                         | 0.1809050879  | 1.0196168065 | -0.0154134275 |
| H                         | 2.0987871654  | 2.4841376665  | 0.0000000000 | H                         | -0.1269794076 | 1.0077498739 | -2.1318483641 |
| O                         | 1.4878605059  | -2.0233517868 | 0.0000000000 | O                         | 0.1264559621  | 1.0175183042 | 2.3407283169  |
| O                         | 3.2687172271  | 0.0079667586  | 0.0000000000 | O                         | 1.5305053585  | 1.0716349822 | 0.0163155671  |
| O                         | 0.2080513133  | 1.8229704043  | 0.0000000000 | H                         | 1.8911645105  | 1.0855359894 | -0.8602256789 |
| H                         | 2.4441728017  | -1.9809655554 | 0.0000000000 | O                         | -1.8989947567 | 0.9394503406 | -1.1756165117 |

**Table S7** Cartesian coordinates of  $CI_{S_2/S_1}$ -Plane (left) and  $CI_{S_2/S_1/S_0}$ -ESIPT (right) optimized at SA3-CASSCF(12,10)//6-31G\* level.

| SA3-CASSCF(12,10)//6-31G* |               |               |              | SA3-CASSCF(12,10)//6-31G* |               |               |               |
|---------------------------|---------------|---------------|--------------|---------------------------|---------------|---------------|---------------|
|                           | X             | Y             | Z            |                           | X             | Y             | Z             |
| C                         | -1.9961203031 | -0.2998239579 | 0.0000000000 | C                         | -4.0379640567 | -1.1738602189 | 0.0008113185  |
| C                         | -1.0628783276 | 0.8687678666  | 0.0000000000 | C                         | -2.6198635835 | -1.1478615190 | 0.0015461200  |
| C                         | 0.3235167989  | 0.5299274178  | 0.0000000000 | C                         | -1.9385579455 | 0.0266483784  | 0.0020599984  |
| C                         | 1.3470921099  | 1.5114154364  | 0.0000000000 | C                         | -2.6762102068 | 1.2403665004  | -0.0000211128 |
| C                         | 2.7460888072  | 1.1060899850  | 0.0000000000 | C                         | -4.0428810001 | 1.2246460925  | -0.0006135448 |
| C                         | 3.1037568663  | -0.2841228350 | 0.0000000000 | C                         | -4.7349233905 | -0.0107690673 | -0.0000102883 |
| C                         | 2.0608905589  | -1.2508399184 | 0.0000000000 | H                         | -4.5464876364 | -2.1210411108 | 0.0009202890  |
| C                         | 0.7266889554  | -0.8478151304 | 0.0000000000 | H                         | -2.0712234116 | -2.0703094231 | 0.0016435586  |
| O                         | -0.1794618552 | -1.8000272655 | 0.0000000000 | C                         | -0.4527685911 | 0.0975454837  | -0.0006607971 |
| C                         | -1.5355629556 | -1.5350609383 | 0.0000000000 | H                         | -4.5739295981 | 2.1581430118  | -0.0016498808 |
| O                         | -3.2961371406 | -0.0012698858 | 0.0000000000 | H                         | -5.8100870705 | -0.0112598308 | -0.0002995566 |
| O                         | -1.5273521785 | 1.9974901439  | 0.0000000000 | C                         | -0.6837536040 | 2.5524864155  | -0.0003659134 |
| H                         | -3.3513767031 | 0.9539471205  | 0.0000000000 | C                         | 0.0195241352  | 1.3741772551  | 0.0008268992  |
| H                         | -2.1142205688 | -2.4322590357 | 0.0000000000 | H                         | -0.2911597368 | 3.5427973872  | -0.0003975705 |
| H                         | 2.2678038250  | -2.3028916995 | 0.0000000000 | O                         | 0.2115966005  | -1.1169555441 | -0.0033708168 |
| H                         | 4.1312976759  | -0.5860267462 | 0.0000000000 | O                         | 1.5667981577  | 1.6001260961  | 0.0057487168  |
| H                         | 3.5085019573  | 1.8602839995  | 0.0000000000 | H                         | 1.1522061171  | -1.0503428978 | -0.0045503348 |
| H                         | 1.0757244876  | 2.5467057529  | 0.0000000000 | O                         | -2.0702695088 | 2.4838312202  | -0.0016170845 |



**Table S8** Cartesian coordinates of CI<sub>S2/S1</sub>-Pukcer-Twist (left) and CI<sub>S1/S0</sub>-Pucker-Twist (right) of cytidine optimized at SA3-CASSCF(12,10)//6-31G\* level

| SA3-CASSCF(12,10)//6-31G* |               |               |               | SA3-CASSCF(12,10)//6-31G* |               |               |               |
|---------------------------|---------------|---------------|---------------|---------------------------|---------------|---------------|---------------|
|                           | X             | Y             | Z             |                           | X             | Y             | Z             |
| C                         | -0.8975184862 | 2.5481052812  | 0.3171163683  | C                         | -0.8592715185 | 2.3415533796  | -1.2336595165 |
| C                         | 0.2988456475  | 1.8453565580  | 0.3427975284  | C                         | 0.1994044262  | 1.8542197370  | -0.4448754222 |
| C                         | 0.3039861305  | 0.4857952363  | 0.0091612345  | C                         | 0.3877846105  | 0.4902037742  | -0.3198888239 |
| C                         | -0.8687173885 | -0.1192700260 | -0.4015468202 | C                         | -0.5336732389 | -0.4268531577 | -0.8999464918 |
| C                         | -2.0801715193 | 0.5596173597  | -0.4140085314 | C                         | -1.5852929218 | 0.0589319345  | -1.6214619366 |
| C                         | -2.0855624504 | 1.9004204700  | -0.0502210271 | C                         | -1.7203171614 | 1.4487196813  | -1.8081431492 |
| H                         | -0.9132325711 | 3.5898076661  | 0.5794300765  | H                         | -0.9966140673 | 3.3987015055  | -1.3614684969 |
| H                         | 1.2145561568  | 2.3323643177  | 0.6221403686  | H                         | 0.8597978901  | 2.5564285626  | 0.0873197172  |
| C                         | 1.4472833148  | -0.4138530237 | 0.0776967031  | C                         | 1.5796925373  | -0.1086937788 | 0.3148223779  |
| H                         | -2.9705675718 | 0.0543664708  | -0.7370471361 | H                         | -2.3028485506 | -0.6227719291 | -2.0357236266 |
| H                         | -3.0078995575 | 2.4512348435  | -0.0784237808 | H                         | -2.5467252276 | 1.8085533408  | -2.3941152346 |
| C                         | 0.4816834998  | -1.9263051740 | -0.8112709642 | C                         | 0.1409981673  | -1.8698059491 | 0.6514463275  |
| C                         | 1.2860935763  | -1.7193630891 | 0.4662292569  | C                         | 1.5077656273  | -1.3163921339 | 0.8179078442  |
| H                         | 0.9610843934  | -1.9504091865 | -1.7805420868 | H                         | -0.6016033415 | -1.5810233721 | 1.3803237249  |
| O                         | 2.8164944161  | 0.1982916188  | -0.0164011048 | O                         | 2.5368504835  | 0.6971881817  | -0.2284072343 |
| O                         | 2.3355406789  | -2.5207263866 | 0.7548842706  | O                         | 2.5784204178  | -2.1919481965 | 0.6276568031  |
| H                         | 2.0083494953  | -3.3973949898 | 0.9112084934  | H                         | 2.7857976779  | -2.5782199544 | 1.4652055218  |
| O                         | -0.7770984546 | -1.3906998166 | -0.8501778789 | O                         | -0.4069377803 | -1.7461174154 | -0.6362887640 |

**Table S9** Cartesian coordinates of  $Cl_{S1/S0}$ -Opening optimized at SA3-CASSCF(12,10)//6-31G\* level

| SA3-CASSCF(12,10)//6-31G* |               |               |               |
|---------------------------|---------------|---------------|---------------|
|                           | X             | Y             | Z             |
| C                         | -0.0208325707 | -1.1131421378 | 2.0333830316  |
| C                         | -0.1619198245 | 0.1615155380  | 1.4946206905  |
| C                         | -0.8926411737 | 0.3532963602  | 0.3181315035  |
| C                         | -1.4677410593 | -0.7531478342 | -0.3134355809 |
| C                         | -1.3360410719 | -2.0153121984 | 0.2196131330  |
| C                         | -0.6111965168 | -2.1983731497 | 1.3890241367  |
| H                         | 0.5349177191  | -1.2567561083 | 2.9414497540  |
| H                         | 0.2824699513  | 1.0138119803  | 1.9738771870  |
| C                         | -0.9978952138 | 1.6773519304  | -0.3049794266 |
| H                         | -1.7949175356 | -2.8427666840 | -0.2879446105 |
| H                         | -0.5087537331 | -3.1872242927 | 1.7970300423  |
| C                         | -2.8217354239 | 0.4690690300  | -1.8245432773 |
| C                         | -3.5029222364 | 1.2149516122  | -0.9382587114 |
| H                         | -2.8086235610 | 0.6617127280  | -2.8826877783 |
| O                         | -0.7489608178 | 2.7537974968  | 0.1192552288  |
| O                         | -4.3121026710 | 2.1740022562  | -1.3843025592 |
| H                         | -4.4976332471 | 2.7867196664  | -0.6850881686 |
| O                         | -2.1166530442 | -0.6385263036 | -1.5055194950 |
